# Supplementary material
Source: publisher figshare collection journal article supplement (https://future-science-group.figshare.com/ndownloader/files/34912806)
Supplement: Supplementary file 1 [file 34912806]

**Patients’ perspectives of a pharmacist-provided clinical pharmacogenomics service**

**Supplementary Data 3: Patient Interview Questions**

**The first few questions will relate to your familiarity with drug-gene testing.**

1. Before having your drug-gene test done, what did you know about how genetics may affect your response to medications?
   - *Prompts: using genetic information to identify drugs to avoid? Using genetic information to calculate doses specifically for you?, etc.*
2. What were your first thoughts when you heard about this type of drug-gene test?
   - *Prompts: medication(s) that you/friend/family member have taken, concern with privacy, potential benefits, etc.*

**The next few questions will be to understand why you had the test done and to assess your attitudes toward this drug-gene testing service.**

1. Who recommended that you get the test done?
   - *Prompts: your doctor, yourself, a friend, a family member, etc.*
2. What was the reason that you decided to have this test done?
   - *Prompts: What type of information were you hoping to learn from your drug-gene test? E.g., reason for previous medication side effects, inability to find a drug that works well for you, general curiosity, etc.*
3. What concerns about drug-gene testing did you have prior to doing the drug-gene test? How did you feel about these concerns after the test? Did you have any new concerns after the test – if so, what were they?
   - *Prompts: Key areas (per the literature) include effectiveness of test, lag time, access, cost, and willingness to pay, implications of results, insurance, privacy, and confidentiality*

**The next few questions will be related to the first clinical visit with the pharmacist. As a reminder, visit one is where** the pharmacist gave a PowerPoint presentation about drug-gene testing, asked about your prior medication side effects, and collected a DNA sample.

1. What thoughts did you initially have when you found out that this service was being provided by a pharmacist?
   - *Prompts: no importance on whether it was a medical doctor, geneticist, pharmacist, or other healthcare professional, was unaware that pharmacist were able to provide services like this, preconceived ideas regarding trust in pharmacists based on previous experiences, etc.*
2. What did you like most about the first clinical visit that you had with the pharmacist? What did you like least about that visit?
   - *Prompts: Was it clear? Confusing? Too technical? Too non-technical? Too long? Too short?*
3. During the first clinical visit, what information did the pharmacist provide you that was most helpful? What information was least helpful? What made this information helpful or unhelpful?
4. What suggestions do you have for changes to the first clinical visit that would have improved your experience?
   - *Prompts: if necessary, remind participant that this question is specific for visit 1, as described above.*

**The next few questions are about the personalized medication report that was given to you by the pharmacist who explained your genetic results to you. *Offer to show an example report again to refresh their memory.***

1. What did you like most about the personalized report? What did you like least about the report?
   - *Prompts: Was it clear? Confusing? Too technical? Too long? Too short? Was the information easy or hard to understand?*
2. What did you learn from your drug-gene test results that surprised you?
   - *Prompts: discovery of drugs to avoid, number of drugs affected by your DNA, types of drugs that were discussed in your report, etc.*
3. Do you have or have access to a copy of the personalized medication report that you received when you had your test done? If yes, where do you keep this document?
   - *Prompts: paper copy of the report at home, electronic file on home computer/saved in cloud, etc.*
4. What suggestions do you have for changes to the personalized medication report that would have improved your experience?

**The next few questions will be about what you did with the information that was provided to you.**

1. With whom have you shared your drug-gene test personalized report? Why did you share it with them? Is there anybody that you would not feel comfortable sharing this information with?
   - *Prompts: What was their reaction? Who else do you plan to share this information with? E.g., primary care physician, local pharmacist, non-healthcare workers such as family members, etc.*
2. Since the test has been done, how have your results been used by your doctor(s) to prescribe new medications or change existing medications?
   - *Prompts: have any of your doctors mentioned this drug-gene test? Do you know if it influenced any of the decisions that they made about your healthcare?*
3. When you had your drug-gene test done, the pharmacist that provided your results offered to update your report with new medications prescribed after the test. Since your test has been done, have you revisited the pharmacist to get an update on the information provided in the report? Why or why not?
   - *Prompts: didn’t know or forgot it was available, too busy to reach out, haven’t begun any new medications?*
4. Do you think the test and pharmacist service is worth the cost? If yes, why? If no, what would you add to make it more valuable from a cost perspective?
5. On a scale of 1-10, with 1 being least satisfied and 10 being most satisfied, how satisfied are you with your decision to have your drug-gene test done and this pharmacist service provided? Would you recommend that other people also use this service? Why or why not?

**To conclude, we have just a few more questions regarding your opinions.**

1. Do you have any additional suggestions for changes that would have improved your experiences surrounding the drug-gene test and pharmacist service?
2. What other comments do you have that have not yet been brought up in this discussion?

**OPTIONAL QUESTIONS (IF TIME ALLOWS):**

1. What additional information would have been helpful to know prior to having your drug-gene test done?
   - *Prompts: better understanding of potential benefits/limitations? How likely it was that one of your current medications would have drug-gene implications?*
2. If you can consider U.S. health practices in the future, imagine everyone has had this drug-gene test done. How do you think it would change the way doctors and pharmacists care for you?
